# Supplementary material for: BWC Assurance: Increasing Certainty in BWC Compliance
Source: Preprints.org preprint supplement (doi:10.20944/preprints202204.0051.v1), 2022-04-07
Supplement: Supplementary file 1 [file supplementary]

## Sheet: Colored
Supplement Table 2
	BWC Articles	Article I	Article II	Article III	Article IV	Article V	Article VI	Article VII	Article X	Data collection, reporting, analysis & sharing	Access	Database or data-sharing platform	Language translation	Make data public	Peer-reviewed academic publications	Presentations	Review Conferences	Side events	Reports	Share data with States Parties	All States Parties	Bilateral	Analysis	CBM analysis	Monitoring trends over time	Machine learning	Other data reporting analysis	Collection mechanism	Automated data collection	Reporting	Confidence-Building Measures (CBMs)	Data content	Applicable materials	Current defense programs	National implementation progress	Government regulatory infrastructure	Legislation for regulation	Industry activity	Military activity	Open source data	Outbreaks of concern	Past weapons programs	Qualitative data	Reasoning or explanation	Quantitative data	Relevant publications	Science & technology capabilities	Sites & facilities	Vaccine production facilities
BWC Articles	7	1	0	0	0	0	0	0	0	0	0	0	0	0	0	0	0	0	0	0	0	0	1	0	0	0	0	0	0	0	2	0	0	0	0	0	0	0	0	0	0	0	0	0	0	0	0	0	0
Article I	1	19	13	6	3	2	2	3	3	1	0	0	0	0	0	0	0	0	0	0	0	0	0	0	0	0	0	0	0	0	0	0	1	0	0	0	0	1	1	0	0	0	0	0	0	0	1	0	0
Article II	0	13	13	6	4	2	2	3	3	1	0	0	0	0	0	0	0	0	0	0	0	0	0	0	0	0	0	0	0	0	0	0	0	0	0	0	0	0	0	0	0	0	0	0	0	0	0	0	0
Article III	0	6	6	12	6	4	4	5	6	0	0	0	0	0	0	0	0	0	0	0	0	0	0	0	0	0	0	0	0	0	0	0	0	0	0	0	0	0	0	0	0	0	1	0	0	0	0	0	0
Article IV	0	3	4	6	10	4	4	5	5	0	0	0	0	0	0	0	0	0	0	0	0	0	0	0	0	0	0	0	0	1	0	0	0	0	1	0	1	0	0	0	0	0	1	0	0	0	0	0	0
Article V	0	2	2	4	4	10	4	4	4	0	0	0	0	1	0	0	0	0	1	1	0	1	0	0	0	0	0	0	0	0	1	0	0	0	0	0	0	1	1	0	0	0	1	0	0	0	0	0	0
Article VI	0	2	2	4	4	4	11	4	4	1	0	0	0	0	0	0	0	0	0	0	0	0	0	0	0	0	1	0	0	0	0	0	0	0	0	0	0	0	0	0	1	0	1	0	0	0	0	1	0
Article VII	0	3	3	5	5	4	4	12	7	1	0	1	0	0	0	0	0	0	0	1	0	0	0	0	0	0	0	1	0	1	0	1	0	1	0	0	0	0	0	0	0	1	1	0	0	0	0	0	1
Article X	0	3	3	6	5	4	4	7	17	0	0	2	0	0	1	0	0	0	1	0	0	0	0	0	0	0	0	1	0	0	0	1	0	0	1	0	0	0	0	0	0	0	1	0	0	0	0	0	0
Data collection, reporting, analysis & sharing	0	1	1	0	0	0	1	1	0	10	0	0	0	1	0	0	0	0	0	2	0	0	3	0	0	0	0	2	0	2	0	1	0	0	1	1	1	0	0	0	0	0	0	0	0	0	0	0	0
Access	0	0	0	0	0	0	0	0	0	0	4	0	0	2	0	0	0	0	0	2	0	0	0	0	0	0	0	0	0	1	0	2	0	0	0	0	0	0	0	0	0	0	0	0	0	0	0	0	0
Database or data sharing-platform	0	0	0	0	0	0	0	1	2	0	0	9	0	3	0	0	0	0	0	2	0	0	0	0	0	0	0	2	0	1	0	1	1	0	1	1	1	1	0	2	2	0	0	1	0	0	0	0	0
Language translation	0	0	0	0	0	0	0	0	0	0	0	0	1	0	0	0	0	0	0	0	0	0	0	0	0	0	0	0	0	0	1	0	0	0	0	0	0	0	0	0	0	0	0	0	0	0	0	0	0
Make data public	0	0	0	0	0	1	0	0	0	1	2	3	0	11	1	0	2	1	0	4	1	0	0	0	0	0	0	0	0	0	3	0	2	1	0	0	0	1	0	5	1	0	0	1	0	1	0	0	0
Peer-reviewed academic publications	0	0	0	0	0	0	0	0	1	0	0	0	0	1	5	0	0	0	0	0	0	0	0	0	0	0	0	0	0	0	0	0	0	0	0	1	0	2	0	1	0	0	0	0	0	3	0	0	0
Presentations	0	0	0	0	0	0	0	0	0	0	0	0	0	0	0	2	0	0	0	0	0	0	0	0	0	0	0	0	0	0	0	0	0	0	0	0	0	0	0	0	0	0	0	0	0	0	0	0	0
Review Conferences	0	0	0	0	0	0	0	0	0	0	0	0	0	2	0	0	6	1	0	1	0	0	0	0	0	0	0	0	0	0	0	0	0	0	0	0	0	0	0	0	0	0	0	0	0	0	0	0	0
Side events	0	0	0	0	0	0	0	0	0	0	0	0	0	1	0	0	1	1	0	1	0	0	0	0	0	0	0	0	0	0	0	0	1	0	0	0	0	0	1	0	1	0	0	1	0	0	0	0	0
Reports	0	0	0	0	0	1	0	0	1	0	0	0	0	0	0	0	0	0	3	0	0	0	1	0	0	0	0	1	0	0	0	1	0	0	0	0	0	0	0	0	0	0	0	0	0	0	0	0	0
Share data with States Parties	0	0	0	0	0	1	0	1	0	2	2	2	0	4	0	0	1	1	0	16	0	0	2	3	2	0	2	1	0	7	3	2	0	1	3	2	2	5	4	0	1	0	0	1	1	0	2	3	0
All States Parties	0	0	0	0	0	0	0	0	0	0	0	0	0	1	0	0	0	0	0	0	2	0	0	0	0	0	0	0	0	0	1	0	0	0	0	0	0	0	0	0	0	1	0	0	0	0	0	0	0
Bilateral	0	0	0	0	0	1	0	0	0	0	0	0	0	0	0	0	0	0	0	0	0	1	0	0	0	0	0	1	0	0	0	1	0	0	0	0	0	0	0	0	0	0	0	0	0	0	0	0	0
Analysis	1	0	0	0	0	0	0	0	0	3	0	0	0	0	0	0	0	0	1	2	0	0	18	1	0	0	1	3	0	3	2	3	2	1	1	1	1	1	1	0	0	0	0	0	0	0	1	2	0
CBM analysis	0	0	0	0	0	0	0	0	0	0	0	0	0	0	0	0	0	0	0	3	0	0	1	13	3	0	0	0	0	0	11	1	1	1	0	0	0	2	2	0	0	0	0	0	0	0	1	2	0
Monitoring trends over time	0	0	0	0	0	0	0	0	0	0	0	0	0	0	0	0	0	0	0	2	0	0	0	3	7	0	0	0	0	0	2	2	1	0	0	0	0	1	1	1	1	0	0	0	0	0	1	3	0
Machine learning	0	0	0	0	0	0	0	0	0	0	0	0	0	0	0	0	0	0	0	0	0	0	0	0	0	1	1	0	1	0	0	0	0	0	0	0	0	0	0	0	0	0	0	0	0	0	0	0	0
Other data reporting analysis	0	0	0	0	0	0	1	0	0	0	0	0	0	0	0	0	0	0	0	2	0	0	1	0	0	1	8	0	0	3	1	2	2	0	0	0	0	3	2	1	0	0	0	0	0	1	0	3	0
Collection mechanism	0	0	0	0	0	0	0	1	1	2	0	2	0	0	0	0	0	0	1	1	0	1	3	0	0	0	0	12	0	0	2	2	0	0	2	0	0	0	0	0	0	0	1	2	1	0	0	0	0
Automated data collection	0	0	0	0	0	0	0	0	0	0	0	0	0	0	0	0	0	0	0	0	0	0	0	0	0	1	0	0	1	0	0	0	0	0	0	0	0	0	0	0	0	0	0	0	0	0	0	0	0
Reporting	0	0	0	0	1	0	0	1	0	2	1	1	0	0	0	0	0	0	0	7	0	0	3	0	0	0	3	0	0	20	6	3	2	1	2	2	3	5	4	0	1	1	0	0	1	1	1	3	2
Confidence-Building Measures (CBMs)	2	0	0	0	0	1	0	0	0	0	0	0	1	3	0	0	0	0	0	3	1	0	2	11	2	0	1	2	0	6	24	4	1	1	1	0	0	6	6	0	0	2	1	1	0	0	1	2	0
Data content	0	0	0	0	0	0	0	1	1	1	2	1	0	0	0	0	0	0	1	2	0	1	3	1	2	0	2	2	0	3	4	18	1	0	2	1	1	1	1	0	2	0	0	1	1	0	2	0	1
Applicable materials	0	1	0	0	0	0	0	0	0	0	0	1	0	2	0	0	0	1	0	0	0	0	2	1	1	0	2	0	0	2	1	1	17	1	0	0	0	5	3	3	5	0	1	1	1	1	4	7	1
Current defense programs	0	0	0	0	0	0	0	1	0	0	0	0	0	1	0	0	0	0	0	1	0	0	1	1	0	0	0	0	0	1	1	0	1	7	1	0	0	4	4	0	2	3	0	0	0	1	0	1	2
National implementation progress	0	0	0	0	1	0	0	0	1	1	0	1	0	0	0	0	0	0	0	3	0	0	1	0	0	0	0	2	0	2	1	2	0	1	12	3	4	1	1	0	1	1	0	0	0	1	0	0	1
Government regulatory infrastructure	0	0	0	0	0	0	0	0	0	1	0	1	0	0	1	0	0	0	0	2	0	0	1	0	0	0	0	0	0	2	0	1	0	0	3	7	3	3	0	0	0	0	0	2	0	1	1	0	1
Legislation for regulation	0	0	0	0	1	0	0	0	0	1	0	1	0	0	0	0	0	0	0	2	0	0	1	0	0	0	0	0	0	3	0	1	0	0	4	3	7	3	0	0	0	0	0	1	0	0	1	0	1
Industry activity	0	1	0	0	0	1	0	0	0	0	0	1	0	1	2	0	0	0	0	5	0	0	1	2	1	0	3	0	0	5	6	1	5	4	1	3	3	18	11	1	1	1	1	2	0	2	5	8	2
Military activity	0	1	0	0	0	1	0	0	0	0	0	0	0	0	0	0	0	1	0	4	0	0	1	2	1	0	2	0	0	4	6	1	3	4	1	0	0	11	13	0	2	2	0	2	1	1	2	7	1
Open source data	0	0	0	0	0	0	0	0	0	0	0	2	0	5	1	0	0	0	0	0	0	0	0	0	1	0	1	0	0	0	0	0	3	0	0	0	0	1	0	14	0	1	0	0	0	1	0	0	0
Outbreaks of concern	0	0	0	0	0	0	1	0	0	0	0	2	0	1	0	0	0	1	0	1	0	0	0	0	1	0	0	0	0	1	0	2	5	2	1	0	0	1	2	0	13	1	0	1	0	1	1	1	1
Past weapons programs	0	0	0	0	0	0	0	1	0	0	0	0	0	0	0	0	0	0	0	0	1	0	0	0	0	0	0	0	0	1	2	0	0	3	1	0	0	1	2	1	1	8	0	0	0	1	0	0	2
Qualitative data	0	0	0	1	1	1	1	1	1	0	0	0	0	0	0	0	0	0	0	0	0	0	0	0	0	0	0	1	0	0	1	0	1	0	0	0	0	1	0	0	0	0	7	1	2	0	0	1	0
Reasoning or explanation	0	0	0	0	0	0	0	0	0	0	0	1	0	1	0	0	0	1	0	1	0	0	0	0	0	0	0	2	0	0	1	1	1	0	0	2	1	2	2	0	1	0	1	8	0	0	1	0	0
Quantitative data	0	0	0	0	0	0	0	0	0	0	0	0	0	0	0	0	0	0	0	1	0	0	0	0	0	0	0	1	0	1	0	1	1	0	0	0	0	0	1	0	0	0	2	0	6	0	0	1	0
Relevant publications	0	0	0	0	0	0	0	0	0	0	0	0	0	1	3	0	0	0	0	0	0	0	0	0	0	0	1	0	0	1	0	0	1	1	1	1	0	2	1	1	1	1	0	0	0	6	0	0	1
Science & technology capabilities	0	1	0	0	0	0	0	0	0	0	0	0	0	0	0	0	0	0	0	2	0	0	1	1	1	0	0	0	0	1	1	2	4	0	0	1	1	5	2	0	1	0	0	1	0	0	15	5	0
Sites & facilities	0	0	0	0	0	0	1	0	0	0	0	0	0	0	0	0	0	0	0	3	0	0	2	2	3	0	3	0	0	3	2	0	7	1	0	0	0	8	7	0	1	0	1	0	1	0	5	14	0
Vaccine production facilities	0	0	0	0	0	0	0	1	0	0	0	0	0	0	0	0	0	0	0	0	0	0	0	0	0	0	0	0	0	2	0	1	1	2	1	1	1	2	1	0	1	2	0	0	0	1	0	0	6
Trademarks	0	0	0	0	0	0	0	0	0	0	0	0	0	1	0	0	0	0	0	1	0	0	0	0	0	0	0	0	0	0	0	0	2	0	0	0	0	2	0	0	0	0	0	0	0	0	1	0	0
Participation	0	0	0	0	0	0	0	0	0	0	0	0	0	0	0	0	0	0	0	0	0	0	0	0	0	0	0	0	0	1	0	0	0	0	0	0	0	0	0	0	0	0	0	0	0	0	0	0	0
CBM completeness	0	0	0	0	0	0	0	1	0	0	0	0	0	1	0	0	0	0	0	0	0	0	0	4	1	0	0	0	0	0	11	1	0	2	0	0	0	1	1	0	0	2	1	0	0	0	0	0	1
CBM participation	0	0	0	0	0	0	0	0	0	0	0	0	0	2	0	0	0	0	0	0	1	0	0	4	0	0	0	0	0	1	10	1	0	1	0	0	0	1	0	0	0	1	1	0	0	0	0	0	0
Data quality	0	0	0	0	0	0	0	0	0	0	1	1	0	0	0	0	0	0	0	2	0	0	3	2	1	0	1	0	0	3	9	1	1	1	1	1	2	2	1	0	0	1	0	0	0	0	0	0	0
Dialogue & diplomacy	0	0	0	0	0	0	0	0	1	1	0	0	0	0	0	0	0	0	0	1	0	0	0	0	0	0	0	0	0	0	1	1	0	0	0	0	0	0	0	0	1	0	0	0	0	0	0	0	0
Content	0	0	0	0	0	0	0	0	0	0	0	0	0	0	0	0	0	0	0	0	0	0	0	0	0	0	0	0	0	0	0	0	0	0	0	0	0	0	0	0	0	0	0	0	0	0	0	0	0
Bolster existing multilateral bodies	1	0	0	0	0	2	1	0	0	0	0	2	0	1	0	0	0	0	1	0	0	0	0	4	1	0	0	0	0	0	5	1	0	0	0	0	0	1	1	0	2	0	0	1	0	0	0	1	0
Create new multilateral body	0	0	0	0	0	0	0	0	0	0	0	0	0	0	0	0	0	0	0	1	0	0	0	0	0	0	0	0	0	0	0	0	0	0	0	0	0	0	0	0	0	0	0	0	0	0	0	0	0
Discuss potential violation	0	1	1	1	0	1	6	0	0	1	1	0	0	2	0	0	0	1	0	4	0	0	0	0	0	0	1	0	0	0	0	0	1	0	0	0	0	0	1	0	5	1	0	3	0	0	1	2	0
Export controls	0	0	0	0	0	0	0	0	1	0	0	0	0	0	1	0	0	0	0	0	0	0	0	0	0	0	0	0	0	0	0	0	2	0	0	1	0	2	0	0	1	0	0	0	0	1	1	0	0
Feedback on data sharing	0	0	0	0	0	1	0	0	0	0	2	0	0	0	0	0	0	0	0	1	0	0	0	0	0	0	0	0	0	1	5	2	1	0	1	0	0	0	0	1	0	1	0	0	0	0	0	1	1
Gauge interest in new mechanisms	0	0	0	0	0	1	0	0	0	0	0	1	0	1	0	0	0	0	2	0	0	0	0	0	0	0	1	1	0	1	4	0	0	0	0	0	0	1	1	0	1	0	0	1	0	0	0	2	0
Review past discussions	1	0	0	0	0	0	0	0	0	0	0	0	0	0	0	0	0	0	1	1	0	0	0	0	0	0	0	0	0	2	0	0	1	0	0	0	0	0	0	0	1	0	0	0	1	0	0	1	0
Support for national implementation	0	0	0	0	0	0	0	0	2	0	0	0	0	0	0	0	0	0	0	0	0	0	0	0	0	0	0	0	0	0	0	0	0	0	2	0	0	0	0	0	0	0	0	0	0	0	0	0	0
Format	0	0	0	0	0	0	0	0	0	0	0	0	0	0	0	0	0	0	0	0	0	0	0	0	0	0	0	0	0	0	0	0	0	0	0	0	0	0	0	0	0	0	0	0	0	0	0	0	0
Bilateral	0	0	0	0	0	0	0	0	0	0	0	0	0	0	0	0	0	0	0	0	0	0	0	0	0	0	0	0	0	0	0	0	0	0	1	0	0	0	0	0	0	0	0	0	0	0	0	0	0
Dialogue or discussions	0	0	0	0	0	3	0	0	0	0	0	0	0	2	0	0	2	1	0	1	0	0	0	0	0	0	0	0	0	0	3	0	1	0	1	0	0	0	0	1	0	2	0	1	0	0	0	1	1
Meeting of States Parties (MSP)	0	0	0	0	0	1	0	0	0	0	0	0	0	1	0	0	1	1	0	2	0	0	0	0	0	0	0	0	0	0	1	0	0	0	1	0	0	0	0	0	0	0	0	0	0	0	0	0	0
Meetings of Experts (MXs)	0	0	0	0	0	0	0	0	0	0	0	0	0	1	0	0	1	1	0	2	0	0	0	0	0	0	0	0	0	0	1	0	0	0	2	0	0	1	1	0	0	0	0	0	0	0	0	0	0
Multilateral	0	0	0	0	0	0	1	0	0	0	0	1	0	1	0	0	0	0	0	0	0	0	0	0	0	0	0	0	0	0	0	0	1	0	0	0	0	1	0	0	1	0	0	0	0	0	1	0	0
Outside BWC	1	0	0	0	0	0	1	1	0	0	0	1	0	2	0	0	0	0	2	1	0	0	2	1	1	0	0	1	0	0	1	1	1	1	0	0	0	1	0	3	2	0	0	0	0	1	0	0	0
Policy or agreement	0	0	0	0	0	0	0	0	0	0	0	0	0	0	0	0	0	0	0	1	0	0	0	0	0	0	0	0	0	0	0	0	0	0	0	0	0	0	0	0	1	0	0	0	0	0	0	0	0
Public statement	0	0	0	0	0	0	0	0	0	0	0	0	0	1	0	0	1	1	1	1	0	0	0	0	0	0	0	1	0	1	1	1	1	0	0	0	0	0	0	0	1	1	0	0	0	0	0	0	0
Review Conference	0	0	0	0	0	0	0	0	0	0	0	0	0	1	0	0	1	1	0	2	0	0	0	0	0	0	0	0	0	0	2	0	0	0	1	0	0	0	0	0	0	0	0	0	0	0	0	0	0
Side event	0	0	0	0	0	0	0	0	0	0	0	0	0	1	0	0	1	1	0	1	0	0	0	0	0	0	0	0	0	0	0	0	1	0	1	0	0	1	2	0	1	0	0	1	0	0	0	0	0
Use of formal BWC mechanism	2	1	1	1	1	3	1	0	0	0	0	0	0	0	0	0	0	0	1	0	0	0	0	1	0	0	0	0	0	3	3	0	0	0	1	0	1	2	1	0	1	0	0	0	0	0	0	1	0
Participation	0	0	0	0	0	1	1	0	1	0	0	1	0	1	0	0	0	0	0	0	0	0	1	0	0	0	0	0	0	0	1	0	0	1	0	0	0	0	1	0	1	0	0	0	0	0	0	0	0
Increase awareness of BWC	1	0	0	0	0	0	0	0	1	0	0	0	0	0	0	0	0	0	0	0	0	0	0	0	0	0	0	0	0	0	1	0	0	0	0	0	0	0	0	0	0	0	0	0	0	0	0	0	0
Meeting and dialogue attendance	0	0	0	0	0	0	0	0	0	0	0	0	0	1	0	0	1	1	0	1	0	0	0	0	0	0	0	0	0	0	0	0	0	0	0	0	0	0	0	0	0	0	0	0	0	0	0	0	0
Universalization efforts	0	0	0	0	0	0	0	0	0	0	0	0	0	0	0	0	0	0	0	0	0	0	0	0	0	0	0	0	0	0	0	0	0	0	0	0	0	0	0	0	0	0	0	0	0	0	0	0	0
National implementation	4	2	1	1	3	0	1	0	1	1	0	0	0	0	0	0	0	0	1	2	0	0	2	1	0	0	0	0	0	3	2	2	1	0	5	0	1	2	2	0	0	0	0	0	0	0	0	2	0
Education & awareness resources	1	0	0	0	0	0	0	0	0	0	0	0	0	0	0	0	0	0	0	1	0	0	0	0	0	0	0	0	0	1	2	0	0	0	0	1	1	1	0	0	0	0	0	2	0	0	1	0	0
Expressed support of the norm	0	1	0	0	0	0	0	1	1	0	0	0	0	1	0	0	0	0	0	2	0	0	0	0	1	0	0	0	0	1	0	0	0	0	0	0	0	0	0	0	0	0	0	0	0	0	0	0	0
National legislation	0	0	0	0	1	0	0	0	0	1	0	0	0	0	0	0	0	0	0	1	0	0	1	0	1	0	0	0	0	1	1	1	2	0	1	1	4	2	1	0	2	0	0	1	0	0	1	1	0
Regulatory body	0	0	0	0	0	0	0	0	1	1	0	0	0	0	1	0	0	0	0	0	0	0	0	0	0	0	0	0	0	0	0	0	2	0	0	2	0	4	1	0	1	0	0	0	0	1	0	1	0
Roster of experts	0	0	0	0	0	1	0	0	0	0	0	0	0	0	0	0	0	0	0	0	0	0	0	0	0	0	0	0	0	0	0	0	0	0	0	0	0	0	0	0	0	0	0	0	0	0	0	0	0
Feasibility	0	0	0	0	0	0	0	0	0	0	0	0	0	0	0	0	0	0	0	0	0	0	0	0	0	0	0	0	0	0	1	0	0	0	0	0	0	0	0	0	0	0	0	0	0	0	0	1	0
Barrier	0	0	0	3	2	4	5	3	4	1	0	1	0	5	1	0	0	1	0	2	1	1	4	4	0	0	2	0	0	5	6	2	3	1	1	0	0	5	4	2	3	3	2	3	2	1	2	6	1
Facilitator	0	0	0	0	0	1	1	0	0	1	0	0	0	4	0	0	0	0	0	4	1	0	1	0	0	0	0	0	0	2	1	2	1	1	0	0	0	3	3	2	1	0	0	0	0	0	0	1	0
Industry cooperation	0	0	0	0	0	0	0	0	1	0	0	0	0	1	1	0	0	0	0	1	0	0	0	0	0	0	1	0	0	0	0	0	2	1	0	0	0	5	1	1	1	0	0	0	0	1	1	0	0
Lobby uncooperative	0	0	0	0	0	0	0	0	0	0	0	0	0	0	0	0	0	0	0	0	0	0	0	0	0	0	0	0	0	0	0	0	0	0	0	0	0	0	0	0	0	0	0	0	0	0	0	0	0
International-level political feasbility	0	0	0	0	0	0	3	1	2	0	1	1	0	3	0	0	1	1	0	2	0	0	1	0	0	0	1	0	0	2	2	1	1	0	1	0	0	2	2	0	4	3	0	2	0	0	2	0	0
Effect of and on non-BWC negotiations	0	0	0	0	0	0	0	0	0	0	0	0	0	0	0	0	0	0	0	0	0	0	0	0	0	0	0	0	0	0	0	0	0	0	0	0	0	0	0	0	0	0	0	0	0	0	0	0	0
Importance of buy-in or consensus	0	0	0	0	0	0	0	0	0	0	0	0	0	0	0	0	0	0	0	2	0	0	1	0	1	0	0	0	0	1	0	2	0	0	0	0	0	0	0	0	0	0	0	0	0	0	0	0	0
Inability to reach consensus	0	0	0	0	0	0	0	0	0	0	0	0	0	0	0	0	0	0	0	0	0	0	0	0	0	0	0	0	0	0	0	0	0	0	0	0	0	0	0	0	0	0	0	0	0	0	0	1	0
National-level political feasibility	0	0	0	0	0	0	0	0	0	0	0	0	0	0	0	0	0	0	0	0	0	0	1	0	0	0	0	0	0	0	0	0	1	1	0	0	0	1	1	0	0	0	0	0	0	0	0	0	0
Political priorities	0	0	0	0	0	0	0	0	0	0	0	0	0	0	0	0	0	0	0	0	0	0	0	0	0	0	1	0	0	1	0	0	1	0	0	0	0	1	0	0	0	0	0	0	0	0	1	0	0
Scientific or technological feasibility	0	1	0	0	0	0	0	0	0	0	0	1	0	1	0	0	0	0	0	1	0	0	0	0	0	0	1	0	0	0	0	1	2	0	0	0	0	4	0	1	2	0	0	1	0	1	1	1	1
Dual-use	0	2	0	0	0	0	0	1	1	0	0	1	0	0	0	0	0	0	0	0	0	0	0	0	0	0	0	0	0	0	0	1	2	1	0	0	0	4	2	1	1	0	2	1	0	0	3	2	0
Technological advancements	0	4	0	1	0	0	1	1	0	0	0	1	0	1	0	0	0	0	0	1	0	0	0	0	0	0	1	0	0	0	0	1	4	1	0	0	0	3	1	3	3	0	0	0	0	1	3	1	0
Funding	0	0	0	0	0	0	2	0	0	1	1	0	0	2	0	0	0	0	0	1	0	0	0	2	0	0	0	0	0	1	2	0	1	0	0	1	0	2	2	0	1	0	0	1	1	0	0	0	0
Historical changes	0	0	0	0	0	0	0	0	0	0	0	0	0	0	0	0	0	0	1	1	0	0	1	0	0	0	0	0	0	1	2	0	2	1	0	0	0	2	1	1	0	1	1	0	2	0	0	2	0
Better	0	1	0	0	0	0	1	0	0	0	0	0	0	0	0	0	0	0	0	1	0	0	0	0	0	0	0	0	0	0	2	0	1	1	0	0	0	2	1	0	2	0	0	0	0	0	2	0	0
Future outlook	0	1	0	0	0	0	0	0	0	0	0	1	0	2	0	0	0	0	0	1	0	0	0	0	0	0	0	0	0	0	1	0	2	0	0	0	0	1	0	2	1	1	0	1	0	0	1	1	0
Worse	0	1	0	0	0	0	1	0	0	0	0	0	0	0	0	0	0	0	0	0	0	0	0	0	0	0	0	0	0	0	0	0	2	0	0	0	0	2	0	0	1	0	0	0	0	0	0	1	0
Motivations or outcomes	0	0	0	0	0	0	0	0	0	0	1	0	0	0	0	0	0	0	0	0	0	0	0	0	0	0	0	0	0	1	2	1	0	0	0	0	0	0	0	0	0	1	0	1	0	0	0	0	0
Other national interests	0	0	0	0	0	0	0	0	0	0	0	0	0	0	0	0	0	0	0	0	0	0	0	0	0	0	0	0	0	0	0	0	0	0	0	0	0	0	0	0	0	0	0	0	0	0	0	0	0
Ability to change focus to other priorities	0	0	0	0	0	0	0	0	0	0	0	0	0	0	0	0	0	0	0	0	0	0	0	0	0	0	0	0	0	0	0	0	0	0	0	0	0	0	0	0	1	0	1	0	0	0	0	0	0
Development	1	2	1	2	2	1	1	2	2	0	0	1	0	1	0	0	0	0	0	1	0	0	0	0	0	0	0	1	0	0	0	0	4	1	1	0	0	2	2	0	3	0	0	1	0	0	2	1	0
Financial interests	0	0	0	0	0	0	0	0	0	0	0	0	0	1	0	0	0	0	0	1	0	0	0	0	0	0	0	0	0	0	0	0	2	1	0	0	0	2	1	1	0	0	0	0	0	0	1	0	0
Reduce resource needs for bioweapons prevention	0	0	0	0	0	0	0	0	0	0	0	0	0	1	0	0	0	0	0	1	0	0	0	0	0	0	0	0	0	0	0	0	0	1	0	0	0	1	0	0	1	0	0	0	0	0	0	0	0
Reputation building	0	0	0	0	0	0	0	0	0	0	0	1	0	1	0	0	0	0	0	1	0	0	0	0	0	0	0	0	0	0	1	1	0	0	0	0	0	1	1	0	1	0	0	0	0	0	0	0	0
Science & technology improvements	1	2	0	0	0	0	0	0	2	0	0	1	0	1	0	0	0	0	0	1	0	0	0	0	0	0	0	0	0	0	0	0	3	1	0	0	0	4	2	0	1	0	0	0	0	0	2	0	0
Security	0	2	2	0	0	0	1	0	0	0	1	1	0	2	0	0	0	0	0	3	0	0	0	0	0	0	0	0	0	1	0	1	2	2	0	0	0	1	2	0	2	1	0	0	0	0	0	1	0
Bolster nonproliferation norm	0	1	0	0	0	0	0	0	1	0	0	0	0	2	0	0	0	0	0	1	0	0	0	0	0	0	0	0	0	0	0	0	0	1	0	0	0	1	0	1	1	0	0	0	0	0	0	0	0
Prevent bioweapons use	2	6	5	4	1	0	0	1	1	0	0	1	0	1	0	0	0	0	0	3	0	0	0	0	1	0	0	0	0	0	0	0	1	2	0	0	0	3	1	0	1	1	0	0	0	0	1	2	0
Non-state actor	0	0	0	0	0	0	0	0	0	0	0	1	0	0	0	0	0	0	0	0	0	0	0	0	0	0	0	0	0	0	0	0	0	0	0	0	0	0	0	0	1	0	0	1	0	0	0	1	0
Promote peace	0	1	0	0	0	0	0	0	1	0	1	0	0	1	0	0	0	0	0	2	0	0	1	0	0	0	0	0	0	0	0	0	1	1	0	0	0	2	2	0	0	1	0	0	0	0	2	0	0
Stability	0	0	0	0	0	0	0	0	0	0	0	0	0	0	0	0	0	0	0	0	0	0	0	0	0	0	0	0	0	0	0	0	0	0	0	0	0	0	0	0	0	0	0	0	0	0	0	0	0
Trust & transparency	0	1	0	0	0	0	1	0	1	0	0	0	0	0	0	0	0	0	0	0	0	0	0	0	0	0	3	0	0	2	3	2	1	0	2	0	0	4	4	0	3	1	0	1	0	0	0	2	0
Accept uncertainty or confusion	0	1	1	1	0	0	0	0	0	0	0	0	0	0	0	0	0	0	0	0	0	0	0	0	0	0	0	0	0	0	0	1	0	0	0	0	0	1	0	0	1	0	0	0	0	0	0	0	0
Alleviate concerns	0	0	0	0	0	4	1	0	1	0	0	0	0	1	0	0	0	1	0	1	0	0	0	0	0	0	0	0	0	0	1	1	1	1	1	0	0	2	5	0	4	0	0	2	0	1	0	1	0
Increase certainty	0	0	0	0	0	0	0	0	0	0	0	0	0	0	0	0	0	0	0	0	0	0	0	0	0	0	0	0	0	1	0	0	0	0	0	0	0	0	0	0	0	0	0	0	0	0	0	0	0
Increase transparency	0	0	0	0	0	1	1	0	2	2	1	1	0	2	0	0	0	1	0	6	0	0	0	0	0	0	0	1	0	4	5	2	2	1	3	1	2	3	4	1	2	1	0	2	0	1	0	2	1
Prevent uncertainty or confusion	0	0	0	0	0	0	0	0	0	0	0	0	0	0	0	0	0	0	0	0	0	0	0	0	0	0	0	0	0	0	0	0	0	0	0	0	0	0	0	0	1	0	0	0	0	0	0	0	0
Promote trust	0	0	0	0	0	1	0	0	0	0	0	0	0	0	0	0	0	0	0	0	0	0	0	0	0	0	0	0	0	0	5	0	0	0	1	0	0	2	2	0	1	0	0	0	0	0	0	0	0
Reduce mistrust	0	0	0	0	0	0	0	0	0	0	0	0	0	0	0	0	0	0	0	0	0	0	0	0	0	0	0	0	0	0	0	0	0	0	0	0	0	0	0	0	0	0	0	0	0	0	0	0	0
Reduce uncertainty or confusion	0	0	0	0	0	4	0	0	1	1	0	0	0	0	0	0	0	0	0	0	0	0	1	0	0	0	0	1	0	0	4	1	0	1	1	0	0	2	3	0	2	0	0	0	0	1	0	1	0
Qualifiers	0	0	0	0	0	0	0	0	0	0	0	0	0	0	0	0	0	0	0	0	0	0	0	0	0	0	0	0	0	0	0	0	0	0	0	0	0	0	0	0	0	0	0	0	0	0	0	0	0
Combination of measures	1	0	0	0	0	0	0	0	0	0	0	0	0	0	0	0	0	0	0	1	0	0	1	0	0	0	0	0	0	4	3	2	0	0	2	1	2	2	1	0	0	0	0	0	0	0	2	2	0
Continual effort	0	0	0	0	0	0	0	0	0	1	1	1	0	0	0	0	0	0	0	1	0	0	0	0	0	0	1	1	0	3	0	1	0	0	2	2	1	1	0	0	0	0	0	0	0	0	0	1	0
Enforcement	0	0	0	0	0	0	1	0	0	0	0	0	0	0	0	0	0	0	1	1	0	0	0	0	0	0	0	0	0	0	0	0	0	0	0	0	0	0	0	0	1	1	0	0	0	0	0	0	0
Flexible	0	0	0	0	0	0	0	0	0	0	1	0	0	0	0	0	0	0	0	0	0	0	0	0	0	0	0	1	0	0	1	0	0	0	1	0	0	0	0	0	0	0	0	0	0	0	0	0	0
In-person	0	0	0	0	0	0	0	0	0	0	0	0	0	0	0	0	0	0	0	1	0	0	0	0	0	0	0	0	0	1	0	0	0	0	0	0	1	0	0	0	0	0	0	0	0	0	0	0	0
Intrusive	0	0	0	0	0	0	0	0	1	0	0	0	0	0	0	0	0	0	0	0	0	0	0	0	0	0	1	1	0	1	0	0	0	0	1	0	0	0	0	0	0	0	0	0	0	0	0	0	0
Legally binding	1	0	0	0	0	0	1	0	1	0	0	0	0	0	0	0	0	0	0	0	0	0	0	1	1	0	0	0	0	0	1	0	0	0	0	0	0	0	0	0	1	0	0	0	0	0	0	0	0
Mandatory	0	0	0	0	0	0	0	0	0	0	0	0	0	0	0	0	0	0	0	1	0	0	0	1	0	0	0	0	0	1	2	0	0	0	0	0	0	1	1	0	0	0	0	0	0	0	0	0	0
Nonintrusive	0	0	0	0	0	0	0	0	0	0	0	0	0	0	0	0	0	0	0	0	0	0	0	0	0	0	0	0	0	0	0	0	0	0	0	0	0	1	0	0	0	0	0	0	0	0	0	0	0
Remote	0	0	0	0	0	0	0	0	0	0	0	1	0	2	0	0	0	0	0	0	0	0	0	0	0	0	0	0	0	0	0	0	1	0	0	0	0	2	0	2	0	0	0	0	0	0	0	1	0
Standardized	0	0	0	0	0	1	0	0	0	2	0	0	1	1	0	0	0	0	0	1	0	1	5	0	0	0	1	1	0	3	1	4	2	0	0	0	0	1	0	0	1	0	0	0	0	0	0	0	0
Voluntary	1	0	0	0	0	0	0	0	0	0	0	0	0	0	0	0	0	0	0	1	0	0	0	0	0	0	0	0	0	2	6	2	0	0	1	0	0	1	1	0	0	0	0	0	0	0	0	0	0
Real-world examples	0	0	0	0	0	0	1	0	0	0	0	0	0	1	0	0	0	1	0	1	0	0	0	0	0	0	0	0	0	0	0	0	1	0	0	0	0	0	1	0	2	1	0	1	0	0	0	1	0
COVID-19 pandemic	0	0	0	0	0	0	2	0	1	1	0	0	0	1	0	0	0	0	0	1	0	0	0	0	0	0	0	0	0	0	0	0	0	1	0	0	0	1	1	0	5	0	0	0	0	0	0	1	0
Protocol negotiations	0	0	0	0	0	0	0	0	0	0	0	0	0	0	0	0	0	0	0	0	0	0	0	0	0	0	0	0	0	0	0	0	0	0	0	0	0	0	0	0	0	0	1	0	1	0	0	0	0
Ad Hoc Group	1	0	0	0	0	0	0	0	0	0	0	0	0	0	0	0	0	0	0	0	0	0	0	0	0	0	0	0	0	1	0	0	0	0	0	0	0	0	0	0	0	0	1	0	1	0	0	0	0
VEREX	0	0	0	1	0	0	0	0	1	0	0	0	0	0	0	0	0	0	0	0	0	0	0	0	0	0	0	0	0	0	0	0	0	0	0	0	0	0	0	0	0	0	0	0	0	0	0	0	0
Roles	0	0	0	0	0	0	0	0	0	0	0	0	0	0	0	0	0	0	0	0	0	0	1	0	0	0	0	2	0	0	0	1	0	0	1	0	0	0	0	0	0	0	0	0	0	0	0	0	0
Civil society	1	0	0	0	0	1	0	0	0	1	0	2	0	1	1	0	0	0	0	0	0	0	1	1	0	0	1	1	0	0	3	1	4	1	0	1	0	3	0	2	1	0	0	0	0	1	1	0	0
General public	0	0	0	0	0	0	0	0	0	1	0	0	0	1	0	0	0	0	0	0	0	0	0	0	0	0	0	0	0	0	0	0	0	0	0	0	0	0	0	1	0	0	0	0	0	0	0	0	0
Industry & biotechnology sector	0	0	0	0	0	0	0	0	0	1	0	0	0	2	1	0	0	0	0	1	0	0	0	0	0	0	1	0	0	0	0	0	2	1	0	0	0	5	1	1	1	0	0	0	0	1	1	0	0
Implementation Support Unit (ISU)	0	0	0	0	0	0	1	0	0	0	0	0	0	0	0	0	0	0	0	1	0	0	1	5	1	0	0	1	0	0	5	1	0	0	0	0	0	0	0	0	0	0	0	0	0	0	0	0	0
States Parties	1	1	1	0	1	2	2	1	1	3	0	1	0	2	0	0	0	0	2	3	1	0	0	3	0	0	1	0	0	3	6	2	1	1	2	0	0	2	3	0	3	2	0	1	0	0	1	2	0
China	0	1	0	0	0	0	0	0	0	0	0	0	0	0	0	0	1	0	0	1	0	0	0	0	0	0	0	0	0	0	0	0	0	0	0	0	0	0	0	0	2	0	0	0	0	0	0	0	0
Diplomats & policymakers	0	0	0	0	0	1	0	0	0	0	0	0	0	0	0	1	1	0	0	0	0	0	0	0	0	0	0	0	0	0	0	0	0	0	0	0	0	0	0	0	1	1	0	0	0	0	0	0	0
Eastern European Group	0	0	0	0	0	0	0	0	0	0	0	0	0	0	0	0	0	0	0	0	0	0	0	0	0	0	0	0	0	0	0	0	0	0	0	0	0	0	0	0	0	0	0	0	0	0	0	0	0
Higher bioweapons risk countries	0	0	0	0	0	0	0	0	0	0	0	0	0	0	0	0	0	0	0	0	0	0	0	0	0	0	0	0	0	0	0	0	2	0	0	0	0	0	1	0	0	0	0	0	0	0	0	0	0
Higher-resource	0	0	0	0	0	0	0	0	0	0	0	0	0	0	0	0	0	0	0	0	0	0	0	0	0	0	0	0	0	1	0	0	1	1	0	0	0	1	1	0	0	0	0	0	0	0	0	1	0
Iran	0	0	0	0	0	0	0	0	0	0	0	0	0	0	0	0	0	0	0	0	0	0	0	0	0	0	0	0	0	0	0	0	0	0	0	0	0	0	0	0	0	0	0	0	0	0	0	0	0
Lower bioweapons risk countries	0	0	0	0	0	0	0	0	0	0	0	0	0	0	0	0	0	0	0	0	0	0	0	0	0	0	0	0	0	0	0	0	0	0	0	0	0	0	0	0	0	1	0	0	0	0	0	0	0
Lower-resource	0	0	0	0	0	0	0	0	1	0	0	0	0	0	0	0	0	0	0	0	0	0	0	0	0	0	0	0	0	0	0	0	1	0	0	0	0	0	0	0	0	0	0	0	0	0	0	0	0
Non-Aligned Movement (NAM)	0	0	0	0	0	0	0	0	0	0	0	0	0	0	0	0	1	0	0	0	0	0	0	0	0	0	0	0	0	0	0	0	0	0	0	0	0	0	0	0	0	0	0	0	0	0	0	0	0
Russian Federation	0	1	0	0	0	0	0	0	0	0	0	0	0	1	0	0	0	1	0	1	0	0	0	0	0	0	0	0	0	0	0	0	1	0	0	0	0	0	1	0	2	1	0	1	0	0	0	0	0
United States of America	0	2	1	0	1	2	0	0	0	0	0	0	0	1	0	0	0	1	0	2	0	1	0	0	0	0	0	0	0	0	1	1	2	2	1	0	0	0	3	0	4	1	1	2	0	0	0	0	0
Western Group	0	0	0	0	0	0	0	0	0	0	1	0	0	1	0	0	0	0	0	1	0	0	0	0	0	0	0	0	0	0	0	0	0	0	0	0	0	0	0	0	0	1	0	0	0	0	0	0	0
United Nations (UN)	0	0	0	0	0	1	2	1	0	0	0	1	0	0	0	0	0	0	0	0	0	0	0	0	0	0	0	0	0	0	0	0	0	0	0	0	0	0	0	0	0	0	0	0	0	0	0	0	0
UN Secretary-General's Mechanism	0	0	0	0	0	0	0	0	0	0	0	0	0	0	0	0	0	0	0	0	0	0	0	0	0	0	0	0	0	0	1	0	0	0	0	0	0	0	0	0	0	0	0	0	0	0	0	0	0
World Health Organization (WHO)	0	0	0	0	0	0	0	0	0	0	0	0	0	0	0	0	0	0	0	1	0	0	0	0	0	0	0	0	0	0	0	0	0	0	0	0	0	0	0	0	1	0	0	0	0	0	0	0	0
Sentiment	0	0	0	0	0	0	0	0	0	0	0	0	0	0	0	0	0	0	0	0	0	0	0	0	0	0	0	0	0	0	0	0	0	0	0	0	0	0	0	0	0	0	0	0	0	0	0	0	0
Anti	0	0	0	0	0	0	1	0	0	0	0	0	0	0	0	0	0	0	0	1	0	0	1	0	0	0	0	0	0	0	1	1	1	1	0	0	0	1	2	0	0	0	0	0	1	0	1	0	0
Needs to improve	1	0	0	0	0	4	2	1	0	2	0	2	1	5	0	0	0	0	0	1	1	0	6	8	1	0	1	0	0	1	14	4	3	1	0	0	0	4	2	1	2	2	2	2	0	0	0	3	0
Pro	3	3	0	1	1	6	3	2	8	5	1	7	1	5	0	1	1	0	1	11	0	0	10	9	4	0	4	6	0	7	15	12	10	4	8	3	4	13	8	8	7	3	3	6	1	4	3	9	3
Sufficient	0	0	0	0	0	0	0	0	0	0	0	0	0	0	0	0	0	0	0	0	0	0	0	0	0	0	0	0	0	0	0	0	0	0	0	0	0	0	0	0	0	0	0	0	0	0	0	0	0
Site visits & expertise engagement	1	0	0	0	0	0	1	0	0	0	0	0	0	0	0	0	0	0	1	0	0	0	0	0	0	0	1	0	0	1	3	1	0	0	0	0	0	1	0	0	0	0	0	0	0	0	0	1	0
Codes of conduct or research ethics	0	0	0	0	0	0	0	0	1	0	0	0	0	0	0	0	1	0	0	0	0	0	0	0	0	0	0	0	0	0	1	0	0	0	0	0	0	2	2	0	0	0	0	0	0	0	0	0	0
Establish & share best practices	1	0	0	0	0	0	0	0	1	0	0	0	0	0	0	0	0	0	0	1	0	0	0	0	0	0	0	0	0	0	0	0	2	0	2	0	0	3	1	0	2	0	0	0	0	0	1	0	0
Expertise engagement & scientific exchange	1	0	0	0	0	1	0	0	2	0	0	1	0	0	0	0	0	0	0	0	0	0	1	0	0	0	0	0	0	0	1	0	0	0	1	0	0	2	1	0	2	0	0	1	0	0	2	0	0
Global roster of experts	0	0	0	0	0	0	0	0	0	0	0	0	0	0	0	0	0	0	0	0	0	0	0	0	0	0	0	0	0	0	0	0	0	0	0	0	0	0	0	0	0	0	0	0	0	0	0	0	0
Fellowships	0	0	0	0	0	0	0	0	0	0	0	0	0	0	0	0	0	0	0	0	0	0	0	0	0	0	0	0	0	0	0	0	0	0	0	0	0	0	0	0	0	0	0	0	0	0	0	0	0
Monitor global science & technololgy capabilities	0	1	0	0	0	0	0	0	0	0	0	0	0	0	0	0	0	0	0	0	0	0	0	0	0	0	0	0	0	0	0	0	0	0	0	0	0	0	0	0	2	0	0	0	0	0	1	0	0
On-site inspections	0	0	0	0	0	0	2	0	0	0	0	0	0	0	0	0	0	0	0	1	0	0	1	1	2	0	1	1	0	4	1	1	2	0	0	0	0	4	3	0	0	0	0	0	1	0	1	3	0
Peer review	0	0	0	0	0	1	0	0	0	0	0	0	0	0	0	0	0	0	0	0	0	0	1	0	0	0	0	0	0	0	4	1	0	0	1	0	0	1	2	0	0	0	0	0	0	0	0	2	0
Scientific advisory board/mechanism	0	0	0	0	0	0	0	0	0	1	0	0	0	0	0	0	0	0	0	0	0	0	0	0	0	0	0	0	0	0	2	0	0	0	0	0	0	0	0	0	0	0	0	0	0	0	0	0	0
Site visits	0	0	0	0	0	2	0	0	0	0	0	0	0	0	0	0	0	0	0	0	0	0	0	0	0	0	1	0	0	1	2	0	0	0	1	0	0	0	0	0	0	0	0	0	0	0	0	1	1
Terminology	0	0	0	0	0	0	0	0	0	0	0	0	0	0	0	0	0	0	0	0	0	0	0	0	0	0	0	0	0	0	0	0	0	0	0	0	0	0	0	0	0	0	0	0	0	0	0	0	0
Assurance	0	0	0	0	0	1	1	0	0	2	0	0	0	2	0	0	1	1	0	3	0	0	1	0	0	0	0	1	0	3	5	2	1	0	0	0	0	2	3	1	1	0	1	2	1	0	0	1	0
Value of assurance	1	1	0	0	0	0	0	0	0	1	1	0	0	1	0	0	0	0	0	2	0	0	0	0	0	0	0	0	0	1	1	1	0	1	0	0	0	2	2	0	1	1	0	0	0	0	0	0	0
Compliance	4	12	9	6	6	3	4	5	9	3	0	0	0	0	0	0	2	0	0	3	0	0	0	0	0	0	0	3	0	4	8	5	1	1	2	1	0	5	6	0	1	0	1	2	1	0	1	0	0
Compliance & noncompliance assessments	2	3	2	2	1	2	5	1	2	3	0	0	0	1	0	0	0	0	1	4	0	0	5	2	2	0	1	4	0	6	6	5	4	0	2	0	0	5	3	0	3	0	3	2	3	0	1	2	0
Noncompliance	0	2	2	2	1	1	3	1	1	0	0	0	0	0	0	0	0	0	0	0	0	0	0	0	0	0	0	1	0	0	0	1	0	0	0	0	0	0	0	0	1	0	0	1	0	0	0	0	0
Risk assessment	0	1	0	0	0	1	0	0	1	1	0	2	0	1	0	0	0	0	1	2	0	0	1	0	0	0	1	0	0	4	2	4	3	0	4	1	3	3	4	1	2	1	2	1	0	0	3	2	1
Confidence	2	2	0	0	0	1	0	0	0	1	1	0	0	1	0	0	0	0	0	1	0	0	0	0	0	0	0	1	0	5	13	2	0	1	2	0	0	3	3	0	1	1	2	0	0	0	0	1	0
Confidence building	0	0	0	0	0	0	0	0	0	0	0	0	0	1	0	0	0	1	0	4	0	0	0	1	1	0	0	0	0	1	6	1	0	0	0	0	0	2	2	0	2	0	0	0	0	0	0	0	0
Connotations	0	0	0	0	0	0	0	0	0	0	0	0	0	0	0	0	0	0	0	0	0	0	0	0	0	0	0	0	0	0	0	0	0	0	0	0	0	0	0	0	0	0	0	0	0	0	0	0	0
Arms control	0	0	0	0	0	1	1	0	0	0	0	0	0	1	0	0	0	0	0	1	0	0	0	0	0	0	0	0	0	2	1	1	1	0	0	0	0	1	1	0	0	1	0	0	1	0	0	1	0
Chemical	0	0	0	0	0	0	2	1	1	1	0	0	0	0	0	0	0	0	0	1	0	0	1	1	1	0	0	0	0	2	0	2	3	0	0	0	0	3	2	0	0	1	2	0	1	0	1	3	0
Field-specific connotation	0	0	0	0	0	0	0	0	0	0	0	0	0	0	0	0	0	0	0	0	0	0	0	0	1	0	0	1	0	1	1	1	2	0	0	0	0	1	0	0	0	1	3	1	2	0	0	1	0
Nuclear	0	0	0	0	0	0	0	0	0	0	0	0	0	0	0	0	0	0	0	0	0	0	0	0	0	0	0	0	0	0	0	0	0	0	0	0	0	0	0	0	0	0	0	0	1	0	0	1	0
Transferable across fields	0	0	0	1	1	2	2	1	1	1	0	1	0	2	0	0	0	0	0	1	1	0	1	1	1	0	0	1	0	3	1	2	3	1	0	0	0	2	1	1	0	1	2	0	0	0	2	3	0
Finger-pointing	0	0	0	0	0	1	0	0	0	0	0	0	0	0	0	0	0	0	0	0	0	0	0	0	0	0	0	0	0	0	0	0	0	0	0	0	0	1	1	0	3	1	0	1	0	0	0	0	0
Politically sensitive	0	0	0	0	0	1	1	0	1	0	0	0	0	1	0	0	1	1	0	2	0	0	1	0	0	0	1	0	0	1	0	0	1	0	1	0	0	2	2	0	2	1	0	1	0	0	1	1	0
Punishment	0	0	0	0	0	0	0	0	0	0	0	0	0	0	0	0	0	0	0	1	0	0	0	0	0	0	0	0	0	0	0	0	0	0	0	0	0	0	0	0	1	0	0	0	0	0	0	0	0
Definitions	0	0	0	0	0	0	0	0	0	0	0	0	0	0	0	0	0	0	0	0	0	0	0	0	0	0	0	0	0	0	0	0	0	0	0	0	0	0	0	0	0	0	0	0	0	0	0	0	0
Binary	0	0	0	0	0	0	0	0	0	0	0	0	0	0	0	0	0	0	0	0	0	0	0	0	0	0	0	0	0	0	0	0	0	0	0	0	0	0	0	0	0	0	0	0	0	0	0	0	0
No one clear definition	0	0	0	0	0	0	1	1	0	0	0	0	0	0	0	0	0	0	0	0	0	0	0	0	0	0	1	0	0	2	1	0	0	0	0	0	0	1	1	0	0	0	0	0	0	0	0	0	0
One-time event	0	0	0	0	0	0	0	0	0	0	0	0	0	0	0	0	0	0	0	0	0	0	0	0	0	0	0	0	0	0	0	0	0	0	0	0	0	0	0	0	0	0	0	0	0	0	0	0	0
Process	1	1	1	0	1	1	1	0	0	2	0	0	0	0	0	0	0	0	1	1	0	1	5	2	0	0	0	2	0	4	2	1	1	0	1	1	1	1	1	1	0	0	0	0	0	0	0	0	0
Spectrum	0	2	1	1	1	0	0	0	0	0	0	0	0	0	0	0	0	0	0	0	0	0	0	0	0	0	0	0	0	0	0	0	0	0	0	0	0	0	0	0	0	0	0	0	0	0	0	0	0
Technical	0	1	1	1	0	0	2	0	1	3	0	1	0	2	0	0	0	0	0	1	0	0	3	0	0	0	0	1	0	2	0	2	3	0	2	0	0	2	1	1	2	0	0	1	1	0	2	3	0
Treaty provisions	2	7	5	4	6	3	3	5	5	3	1	0	0	0	0	0	2	0	0	2	0	0	0	0	0	0	0	1	0	3	2	2	0	0	1	0	0	1	1	0	0	0	0	2	0	0	0	0	0
Adjacent agreements	0	1	1	1	1	0	0	0	1	0	0	0	0	0	0	0	2	0	0	0	0	0	0	0	0	0	0	0	0	0	0	0	0	0	0	0	0	0	0	0	0	0	0	0	0	0	0	0	0
Treaty prohibitions	1	5	4	3	3	2	2	2	3	2	0	0	0	0	0	0	2	0	0	0	0	0	0	0	0	0	0	0	0	0	0	1	0	0	0	0	0	0	0	0	0	0	0	1	0	0	0	0	0
Treaty obligations	1	3	3	4	5	3	3	3	4	1	0	0	0	0	0	0	2	0	0	0	0	0	0	0	0	0	0	0	0	1	0	1	0	0	0	0	0	1	1	0	0	0	0	0	0	0	0	0	0
Effectiveness of the treaty	1	0	0	0	0	0	1	0	0	1	0	0	0	0	0	0	0	0	1	0	0	0	0	0	0	0	0	0	0	0	0	1	1	0	0	0	0	1	0	0	0	1	0	0	0	0	0	1	0
Fulfill obligations	2	3	1	1	1	1	2	1	1	0	0	0	0	0	0	0	0	0	1	0	0	0	2	0	0	0	0	1	0	0	2	0	0	0	1	0	0	1	1	0	0	0	1	0	1	0	0	0	0
Implementation of the treaty	3	2	0	0	1	1	0	1	0	0	0	1	0	1	0	0	0	0	1	0	0	0	1	1	0	0	0	0	0	1	2	0	0	0	2	0	1	0	0	0	1	0	1	0	1	0	0	0	0
Monitoring	1	0	0	0	0	0	1	0	1	5	1	3	0	3	1	0	0	0	1	5	1	1	4	3	5	0	2	9	0	4	6	8	7	0	4	1	1	5	3	7	5	0	1	3	2	1	7	4	1
Strengthen	2	2	0	1	1	0	2	1	1	0	0	0	0	1	0	0	1	0	1	1	0	0	0	0	0	0	1	0	0	0	6	1	2	0	1	1	1	1	1	0	1	0	0	0	0	0	0	2	0
Verification	1	8	8	4	3	1	4	1	3	3	0	1	0	1	0	1	1	0	0	5	0	0	8	0	1	0	2	3	0	4	5	2	5	1	1	1	1	5	5	1	3	1	1	2	2	0	3	5	0
Verification mechanism	1	0	0	0	0	1	2	0	1	1	0	0	0	0	0	0	0	0	0	2	0	0	3	0	0	0	2	1	0	4	3	0	2	0	2	0	0	4	2	1	1	0	0	0	0	0	0	2	0
[truncated: 170 more columns]
