# Supplementary material for: BWC Assurance: Increasing Certainty in BWC Compliance
Source: Preprints.org preprint supplement (doi:10.20944/preprints202204.0051.v1), 2022-04-07
Supplement: Supplementary file 2 [file Supplement Table 1- Codebook Stats.xlsx]

## Sheet: Code stats
Supplementary Table 1
Code	Interviews	Coding References
Data collection, reporting, analysis & sharing	10	25
Analysis	18	41
CBM analysis	13	34
Other data reporting analysis	8	19
Monitoring trends over time	7	15
Machine learning	1	3
Participation	3	3
CBM participation	18	59
CBM completeness	15	43
Data quality	15	37
Data content	18	44
Sites & facilities	14	48
Vaccine production facilities	6	8
Applicable materials	17	54
Past weapons programs	8	18
Current defense programs	7	18
National implementation progress	12	28
Legislation for regulation	7	16
Government regulatory infrastructure	7	12
Military activity	13	59
Industry activity	18	104
Outbreaks of concern	13	42
Relevant publications	6	10
Science & technology capabilities	15	27
Open source data	14	30
Trademarks	3	8
Qualitative data	7	14
Reasoning or explanation	8	24
Quantitative data	6	9
Collection mechanism	12	22
Reporting	20	64
Confidence-Building Measures (CBMs)	24	168
Automated data collection	1	1
Access	4	8
Make data public	11	32
Language translation	1	2
Peer-reviewed academic publications	5	5
Reports	3	9
Database or data-sharing platform	9	16
Presentations	2	2
Review Conferences	6	6
Side events	1	3
Share data with States Parties	16	62
Bilateral	1	2
All States Parties	2	2
Dialogue & diplomacy	13	28
Participation	11	22
Meeting and dialogue attendance	7	11
Universalization efforts	5	7
Increase awareness of BWC	11	30
Content	0	0
Review past discussions	11	37
Feedback on data sharing	8	16
Discuss potential violation	18	76
Gauge interest in new mechanisms	10	47
Support for national implementation	14	36
Create new multilateral body	14	25
Bolster existing multilateral bodies	21	102
Export controls	6	13
Format	0	0
Use of formal BWC mechanism	15	82
Policy or agreement	12	19
Public statement	8	13
Dialogue or discussions	18	59
Meetings of Experts (MXs)	12	28
Meeting of States Parties (MSP)	9	15
Review Conference	10	14
Side event	2	6
Outside BWC	17	62
Bilateral	7	11
Multilateral	17	37
Funding	14	51
Site visits & expertise engagement	14	54
Peer review	22	66
Site visits	14	39
On-site inspections	22	89
Expertise engagement & scientific exchange	26	85
Global roster of experts	3	4
Establish & share best practices	16	48
Fellowships	3	5
Codes of conduct or research ethics	13	42
Monitor global science & technology capabilities	13	27
Scientific advisory board/mechanism	10	36
National implementation	22	93
Expressed support of the norm	9	14
National legislation	15	55
Regulatory body	13	39
Education & awareness resources	12	35
Roster of experts	3	6
Roles	7	13
Civil society	24	69
Scientific advisory board/mechanism	19	82
Implementation Support Unit (ISU)	16	57
United Nations (UN)	9	21
World Health Organization (WHO)	10	11
UN Secretary-General's Mechanism (UNSGM)	11	27
States Parties	24	166
Diplomats & policymakers	12	35
Higher-resource	6	15
Lower-resource	4	7
Higher bioweapons risk countries	3	4
Lower bioweapons risk countries	2	3
United States of America	14	44
Russia	4	9
China	5	11
Iran	1	1
Western Group	2	4
Eastern European Group	2	3
Non-Aligned Movement (NAM)	3	4
General public	6	15
BWC Articles	7	30
Article I	19	58
Article II	13	31
Article III	12	23
Article IV	10	20
Article V	10	37
Article VI	11	26
Article VII	12	26
Article X	17	42
Real-world examples	9	18
VEREX	6	9
Protocol negotiations	11	34
Ad Hoc Group	7	34
COVID-19 pandemic	16	68
Qualifiers	0	0
Remote	8	16
In-person	7	11
Mandatory	5	11
Legally binding	12	67
Enforcement	6	27
Voluntary	18	47
Continual effort	11	29
Combination of measures	22	62
Intrusive	6	21
Nonintrusive	1	4
Standardized	23	60
Flexible	9	15
Terminology	3	5
Verification	35	297
Verification mechanism	24	95
Compliance	33	220
Noncompliance	14	42
Compliance & noncompliance assessments	29	190
Risk assessment	22	84
Confidence	32	131
Confidence building	18	47
Monitoring	32	165
Strengthen	33	149
Assurance	16	76
Value of assurance	27	100
Implementation of the treaty	28	107
Effectiveness of the treaty	13	56
Fulfill obligations	21	81
Definitions	4	4
Technical	16	92
Binary	2	4
Spectrum	6	15
One-time event	2	6
Process	26	79
No one clear definition	19	62
Treaty provisions	27	183
Treaty prohibitions	13	57
Treaty obligations	13	42
Adjacent agreements	4	10
Connotations	5	10
Finger-pointing	11	28
Punishment	8	17
Politically sensitive	21	57
Arms control	12	56
Field-specific connotation	20	61
Transferable across fields	21	78
Chemical	25	111
Nuclear	15	25
Feasibility	6	11
Scientific or technological feasibility	23	55
Technological advancements	27	138
Dual-use	22	66
Industry cooperation	14	63
Lobby uncooperative	1	1
National-level political feasibility	10	27
Political priorities	17	44
International-level political feasbility	24	156
Inability to reach consensus	16	43
Importance of buy-in or consensus	15	39
Effect of and on non-BWC negotiations	8	23
Facilitator	22	123
Barrier	33	321
Historical changes	21	79
Better	22	57
Worsened	16	60
Future outlook	16	41
Sentiment	0	0
Pro	31	574
Anti	17	63
Needs to improve	31	260
Sufficient	4	4
Motivations or outcomes	7	13
Trust & transparency	26	102
Prevent uncertainty or confusion	4	4
Reduce uncertainty or confusion	15	63
Accept uncertainty or confusion	10	25
Increase certainty	7	9
Promote trust	18	70
Reduce mistrust	7	16
Alleviate concerns	14	49
Increase transparency	21	80
Security	16	58
Prevent bioweapons use	25	107
Non-state actor	11	33
Promote peace	11	26
Bolster nonproliferation norm	23	71
Stability	5	8
Other national interests	3	3
Reputation building	13	30
Financial interests	10	36
Development	16	72
Science & technology improvements	14	57
Ability to change focus to other priorities	4	10
Reduce resource needs for bioweapons prevention	3	8
