# Supplementary material for: BWC Assurance: Increasing Certainty in BWC Compliance
Source: Preprints.org preprint supplement (doi:10.20944/preprints202204.0051.v1), 2022-04-07
Supplement: Supplementary file 4 [file Supplement Table Captions.docx]

Supplement Table 1- Summary of quantitative analysis for thematic codes, including the total number of interviews in which each code was utilized and the total number of coding references to which each code was assigned across all interviews. The table also displays the organizational hierarchy of codes implemented to facilitate the coding process. Four high-level codes—content, format, qualifiers, and sentiment—were not assigned to any text, but rather, served to organized lower-level codes.

Supplement Table 2- Summary of quantitative analysis for co-coded pairs. The value in each cell corresponds to the number of interviews in which the same text was coded to both of the associated codes. Cells are colored by relative magnitude, with darker shades corresponding to larger values. The Row labels also display the organizational hierarchy of codes implemented to facilitate the coding process. Four high-level codes—content, format, qualifiers, and sentiment—were not assigned to any text, but rather, served to organized lower-level codes.
